# Supplementary material
Source: Copernicus journal article supplement (doi:10.5194/egusphere-2026-3272)
Supplement: Supplementary file 1 [file egusphere-2026-3272-supplement.pdf]

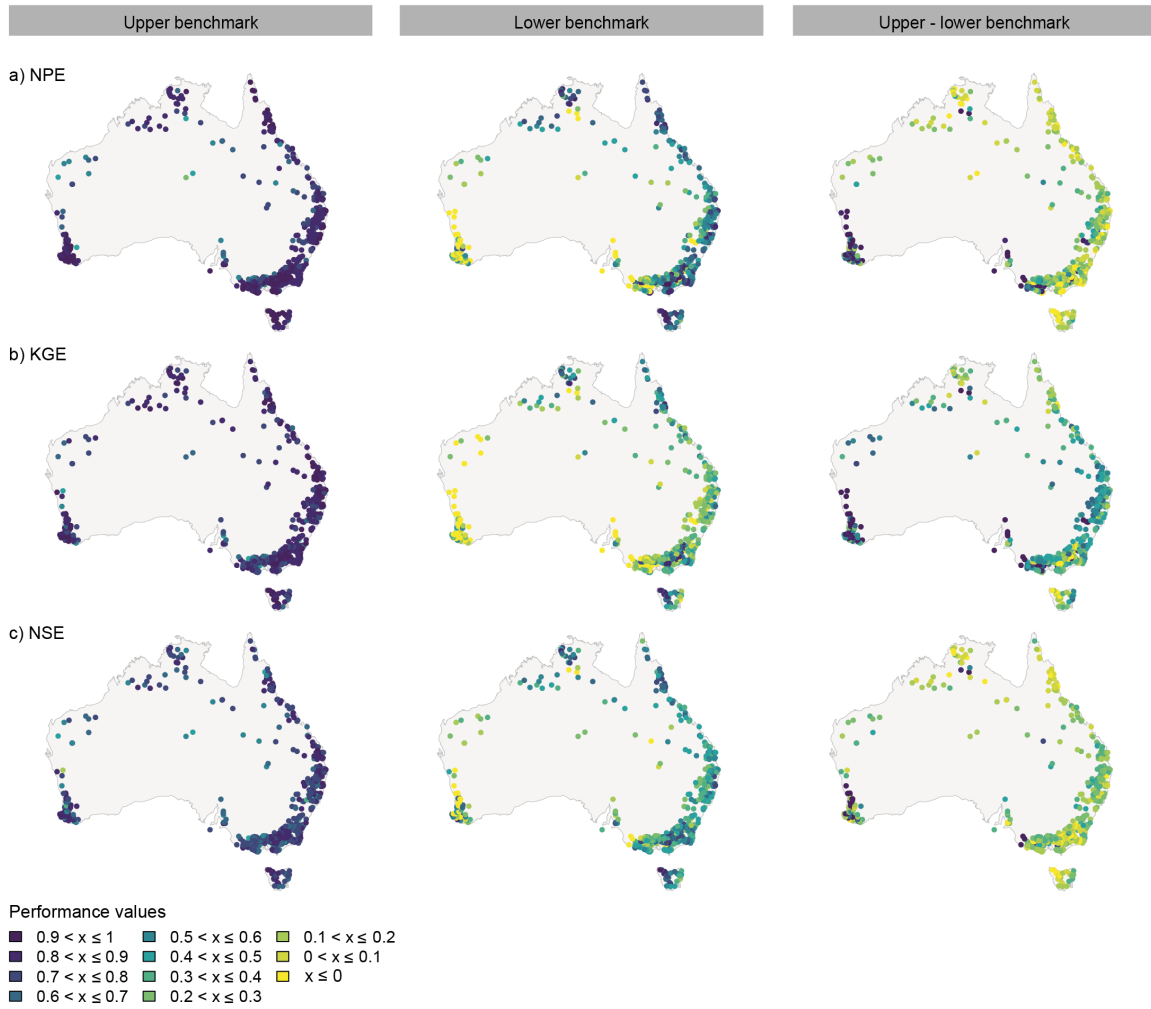

Figure S1: Spatial patterns of model performance for catchments in the Australia (CAMELS-AUS dataset) for the upper benchmark (first column), lower benchmark (represented by the ensemble mean of 1000 parameterizations, second column), and the difference between upper and lower benchmark (third column). Values are shown for a) NPE, b) KGE, and c) NSE.

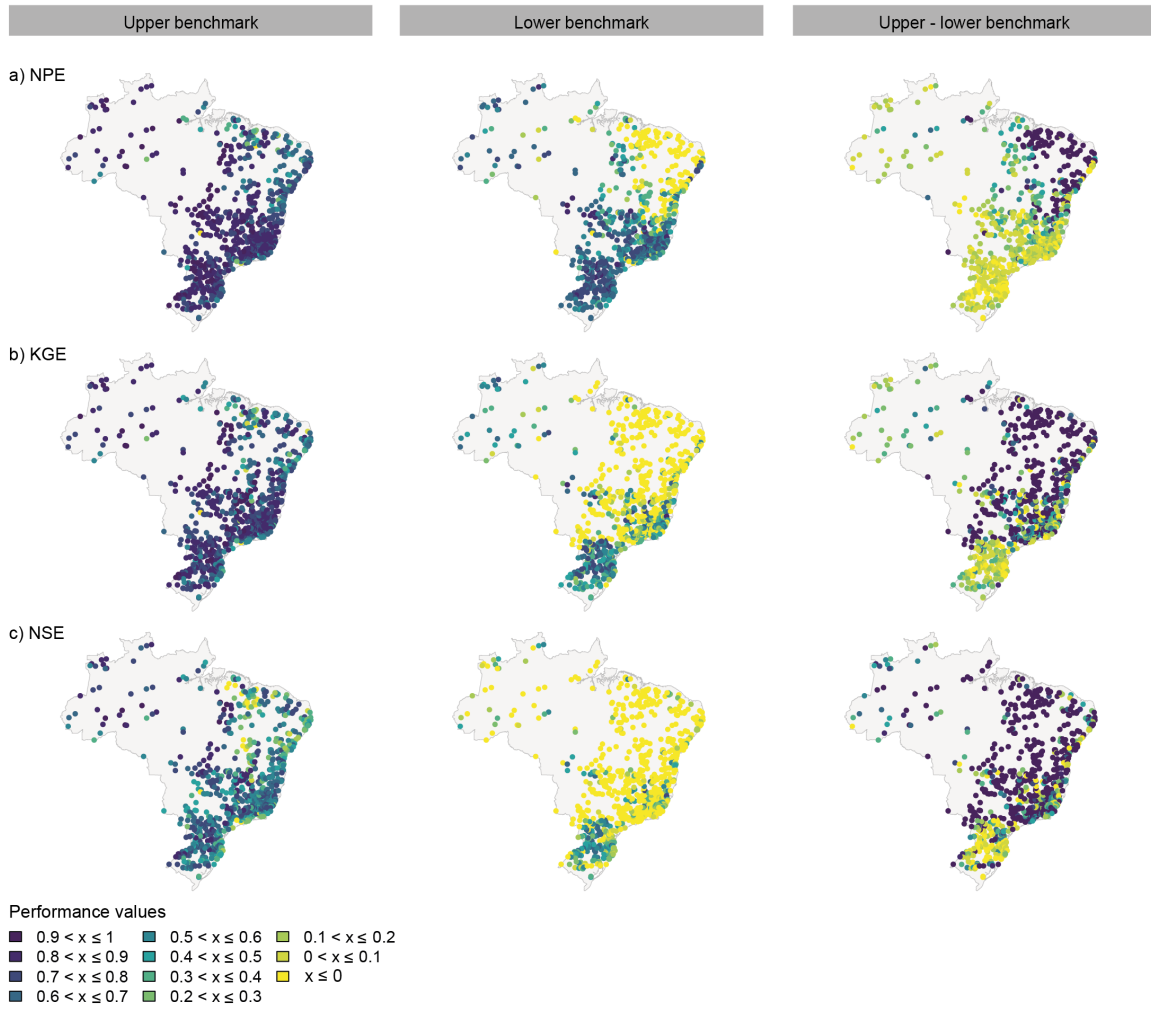

Figure S2: Spatial patterns of model performance for catchments in the Brazil (CAMELS-BR dataset) for the upper benchmark (first column), lower benchmark (represented by the ensemble mean of 1000 parameterizations, second column), and the difference between upper and lower benchmark (third column). Values are shown for a) NPE, b) KGE, and c) NSE.

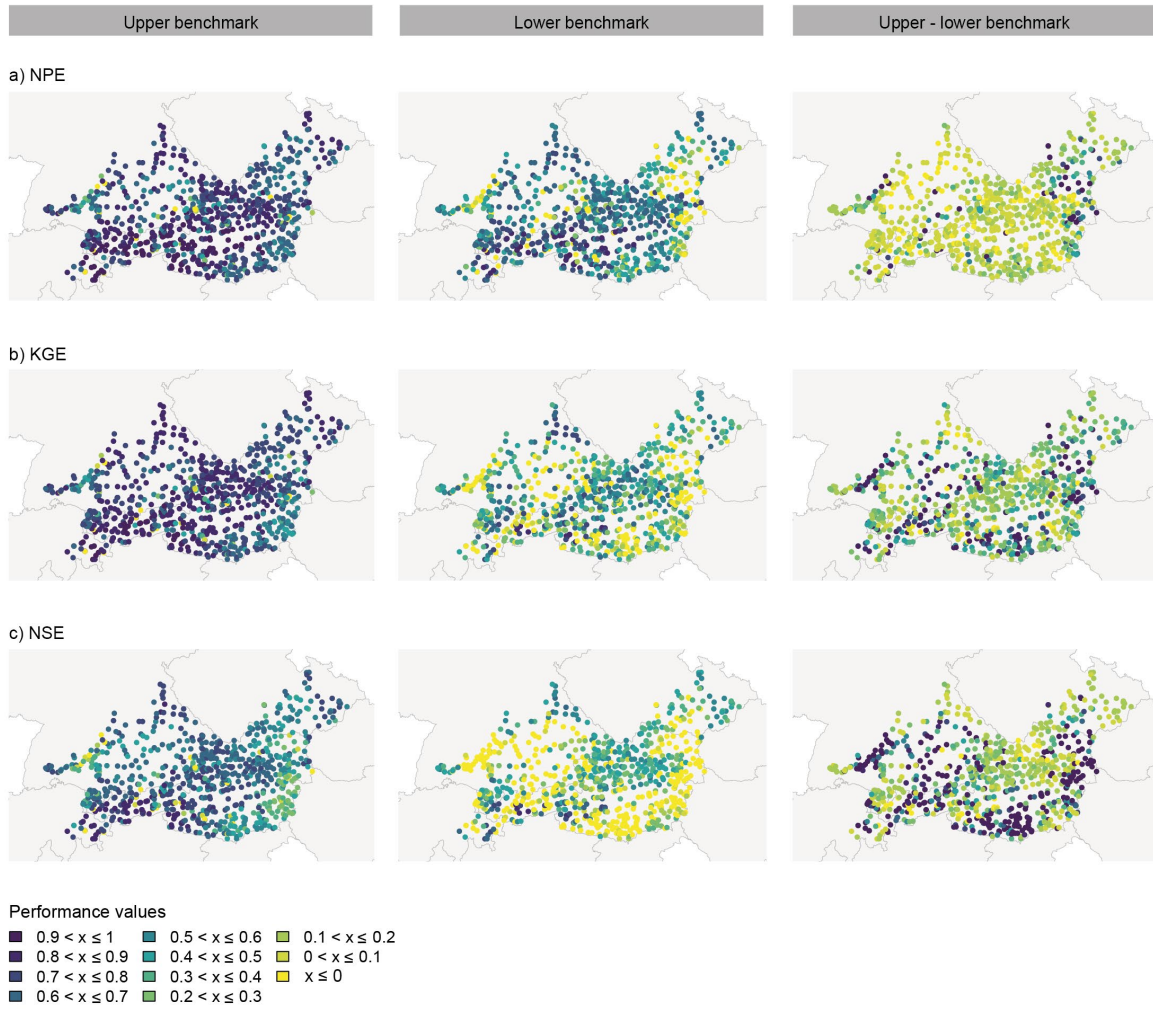

Figure S3: Spatial patterns of model performance for catchments in the Central Europe (LamaH-CE dataset) for the upper benchmark (first column), lower benchmark (represented by the ensemble mean of 1000 parameterizations, second column), and the difference between upper and lower benchmark (third column). Values are shown for a) NPE, b) KGE, and c) NSE.

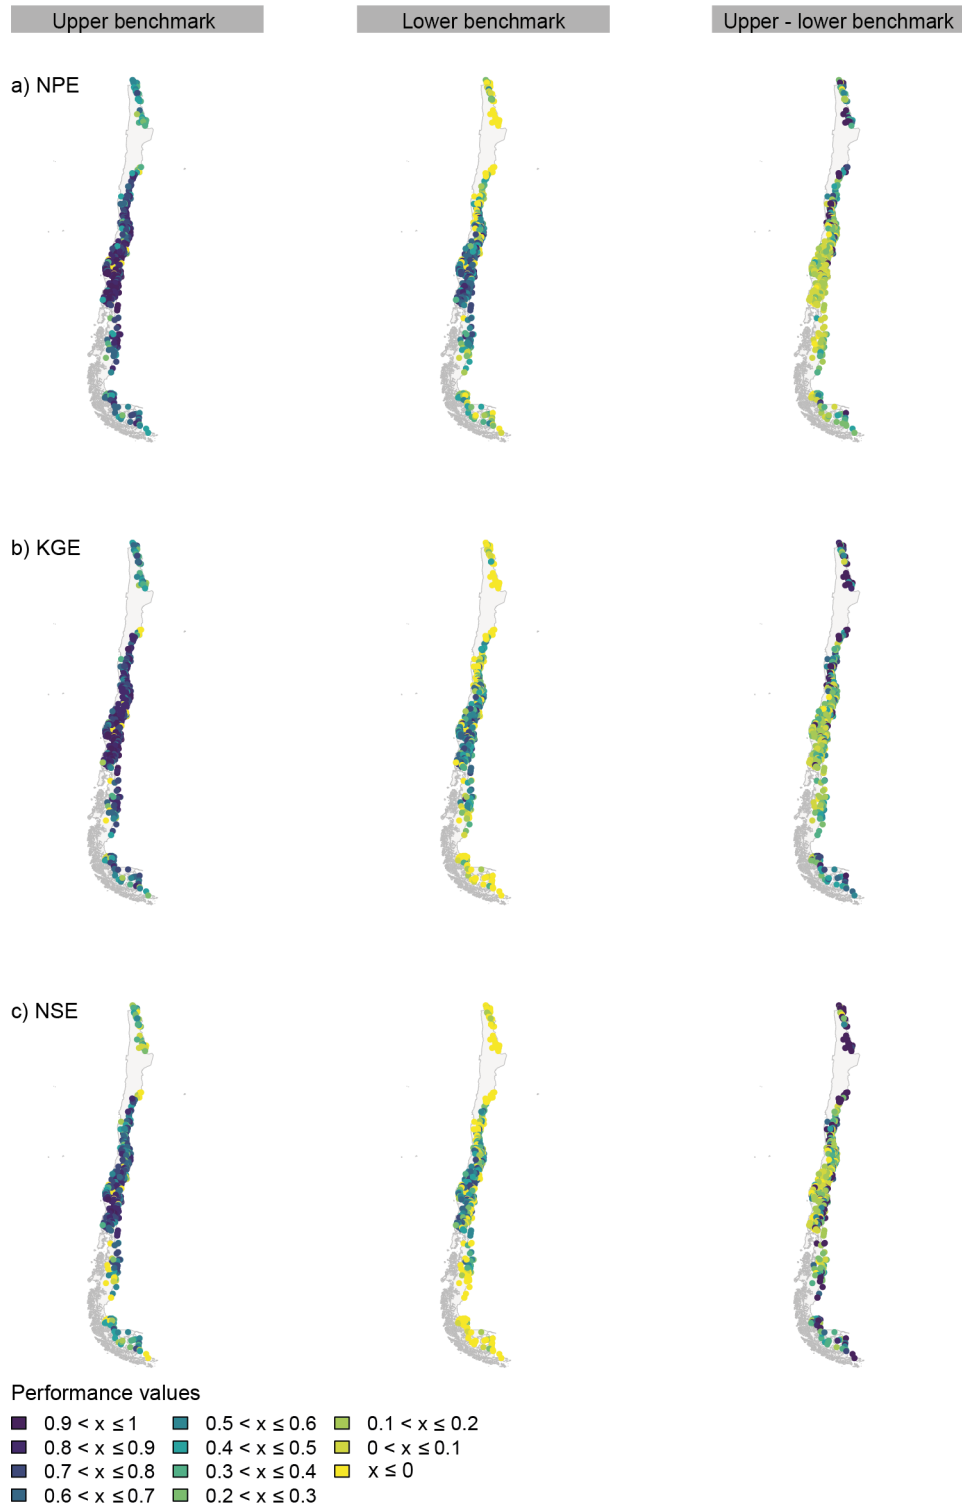

Figure S4: Spatial patterns of model performance for catchments in the Chile (CAMELS-CL dataset) for the upper benchmark (first column), lower benchmark (represented by the ensemble mean of 1000 parameterizations, second column), and the difference between upper and lower benchmark (third column). Values are shown for a) NPE, b) KGE, and c) NSE.

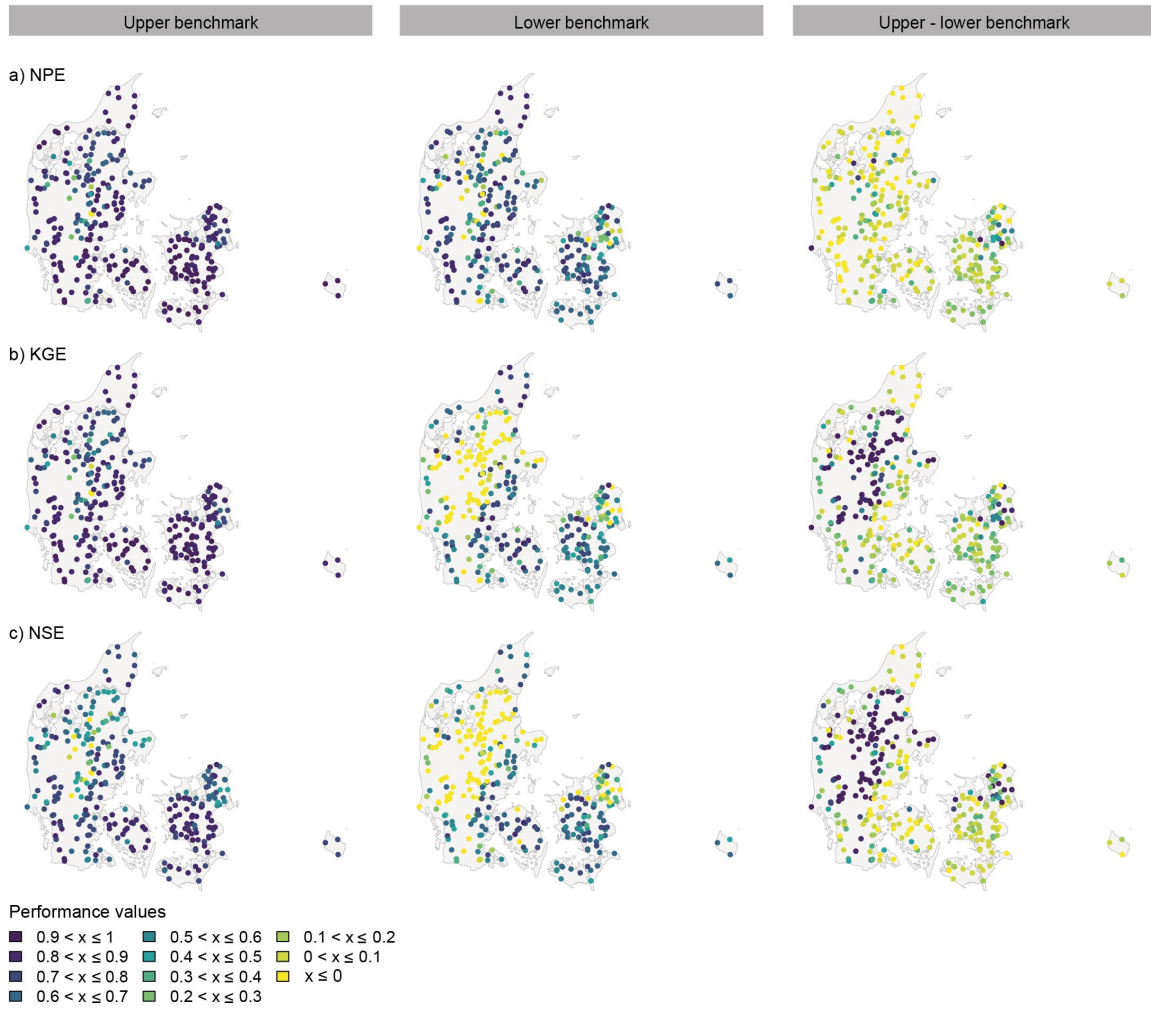

Figure S5: Spatial patterns of model performance for catchments in the Denmark (CAMELS-DK dataset) for the upper benchmark (first column), lower benchmark (represented by the ensemble mean of 1000 parameterizations, second column), and the difference between upper and lower benchmark (third column). Values are shown for a) NPE, b) KGE, and c) NSE.

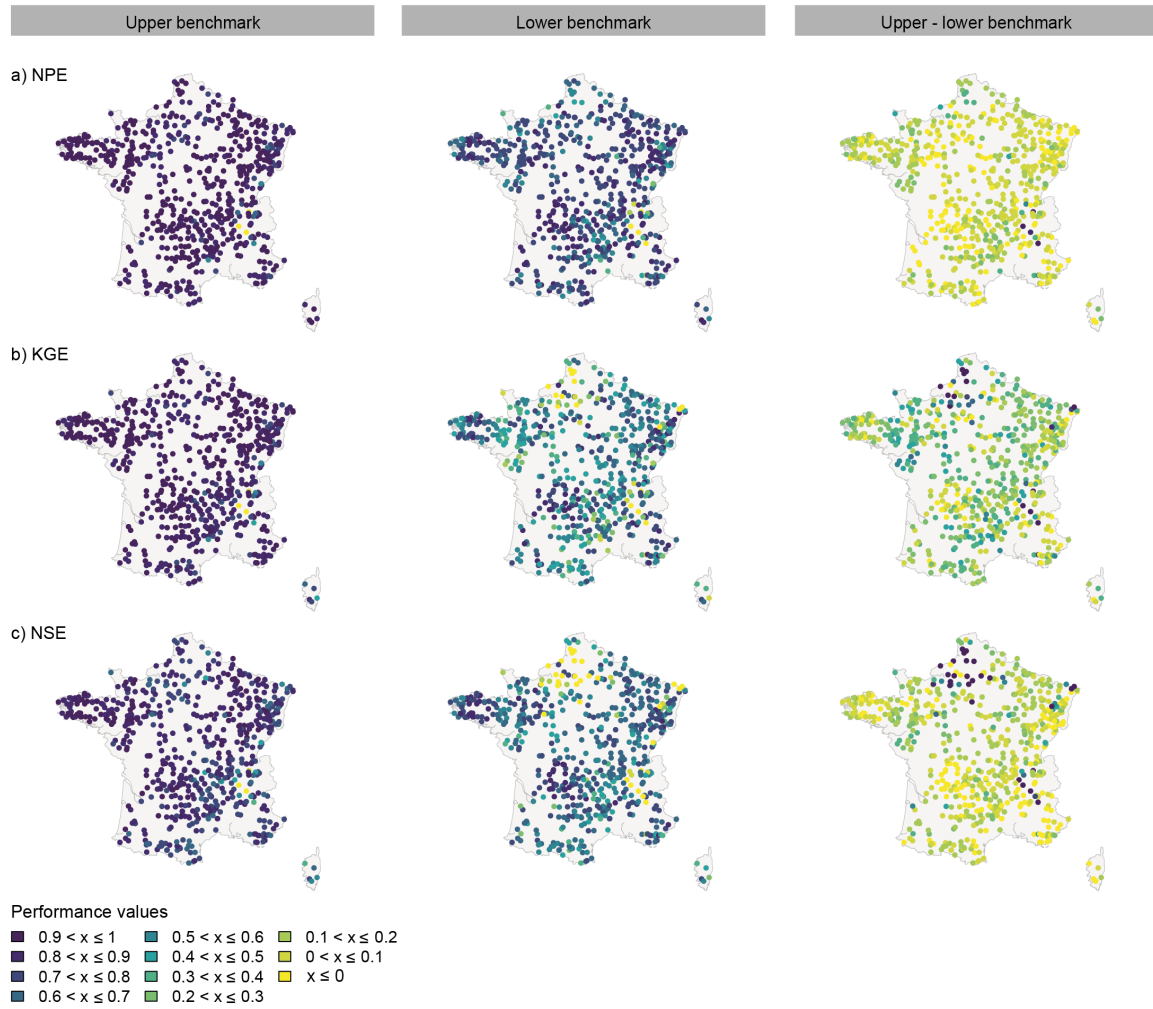

Figure S6: Spatial patterns of model performance for catchments in the France (CAMELS-FR dataset) for the upper benchmark (first column), lower benchmark (represented by the ensemble mean of 1000 parameterizations, second column), and the difference between upper and lower benchmark (third column). Values are shown for a) NPE, b) KGE, and c) NSE.

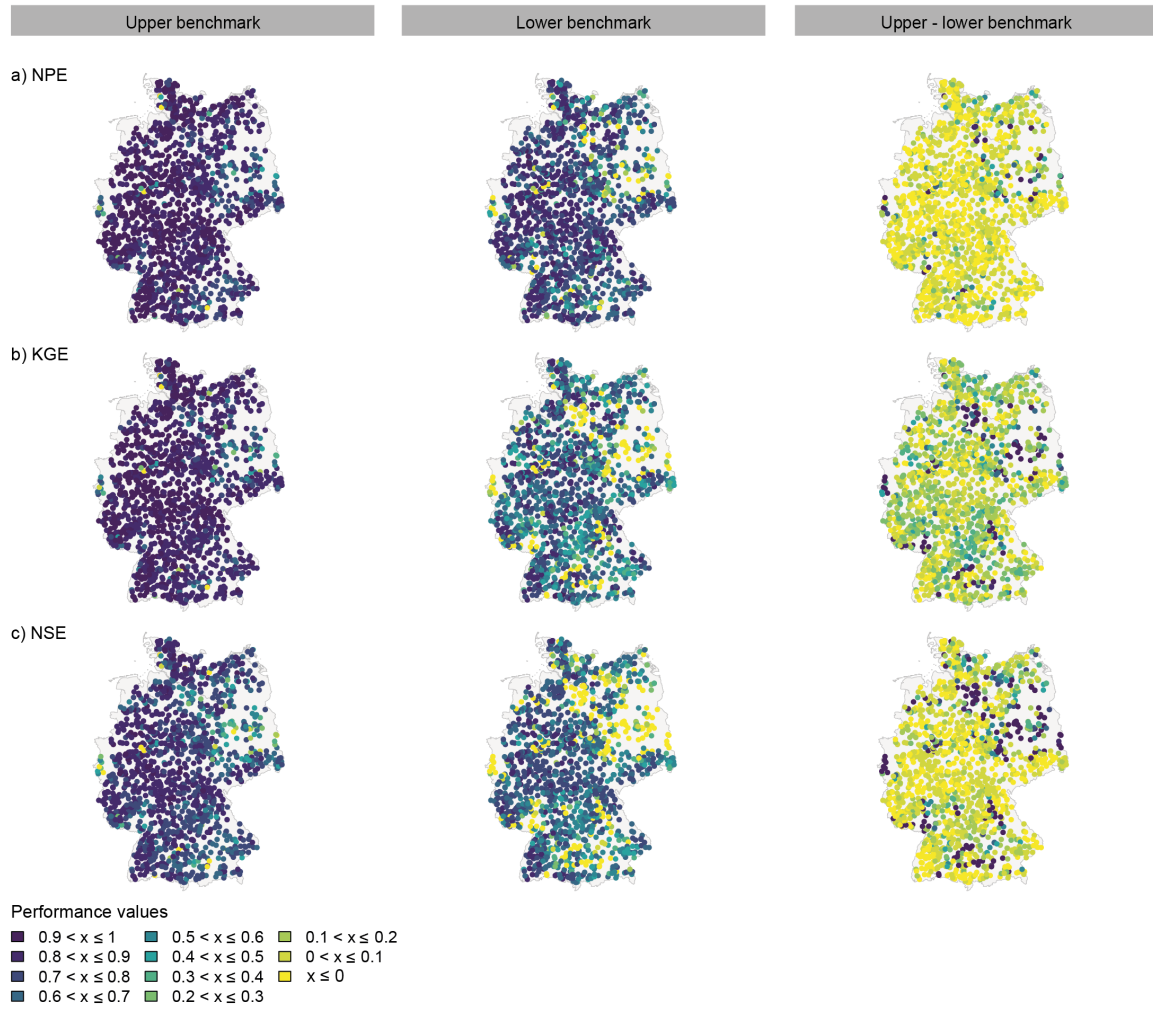

Figure S7: Spatial patterns of model performance for catchments in the Germany (CAMELS-DE dataset) for the upper benchmark (first column), lower benchmark (represented by the ensemble mean of 1000 parameterizations, second column), and the difference between upper and lower benchmark (third column). Values are shown for a) NPE, b) KGE, and c) NSE.

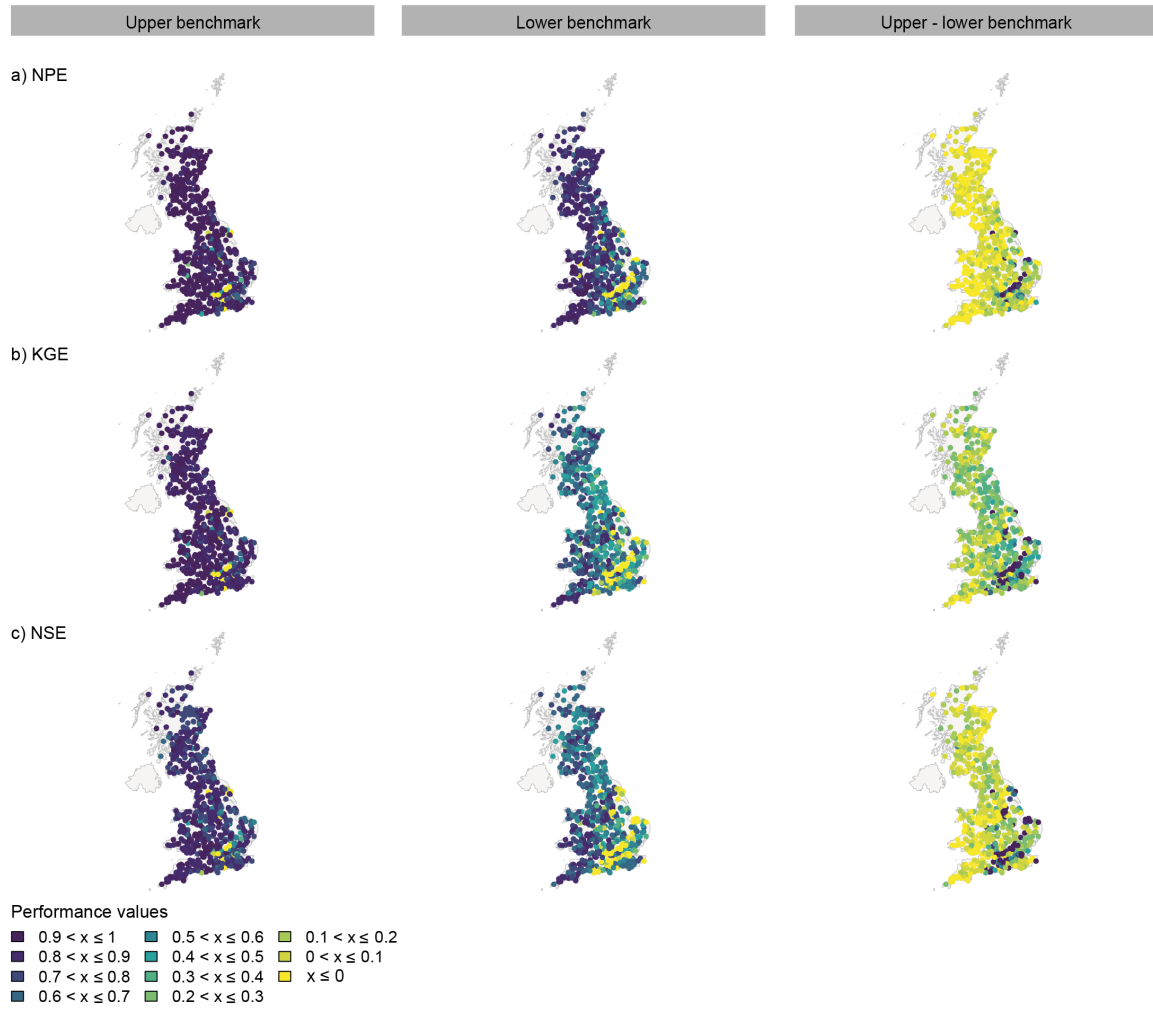

Figure S8: Spatial patterns of model performance for catchments in the Great Britain (CAMELS-GB dataset) for the upper benchmark (first column), lower benchmark (represented by the ensemble mean of 1000 parameterizations, second column), and the difference between upper and lower benchmark (third column). Values are shown for a) NPE, b) KGE, and c) NSE.

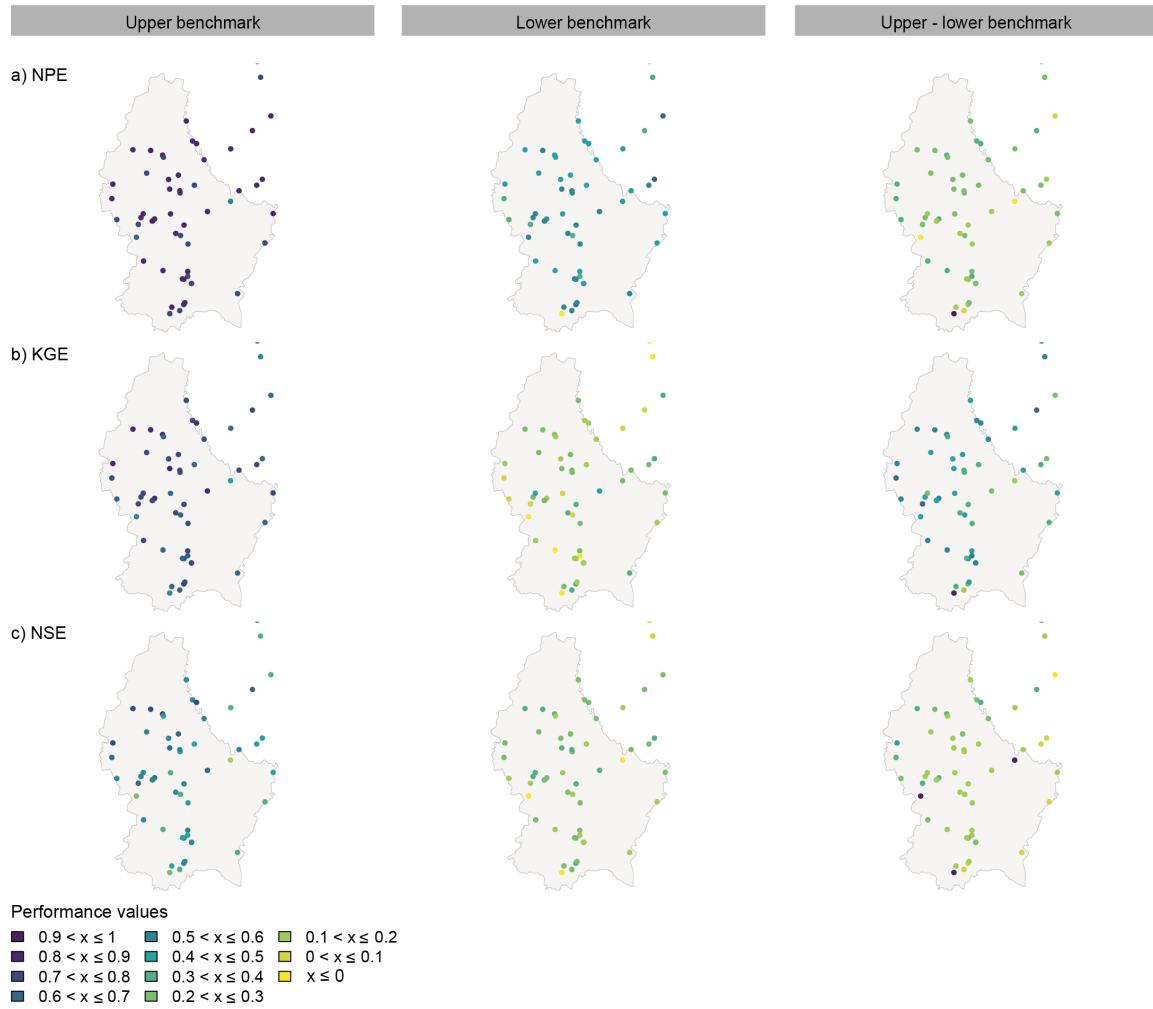

Figure S9: Spatial patterns of model performance for catchments in the Luxembourg (CAMELS-LUX dataset) for the upper benchmark (first column), lower benchmark (represented by the ensemble mean of 1000 parameterizations, second column), and the difference between upper and lower benchmark (third column). Values are shown for a) NPE, b) KGE, and c) NSE.

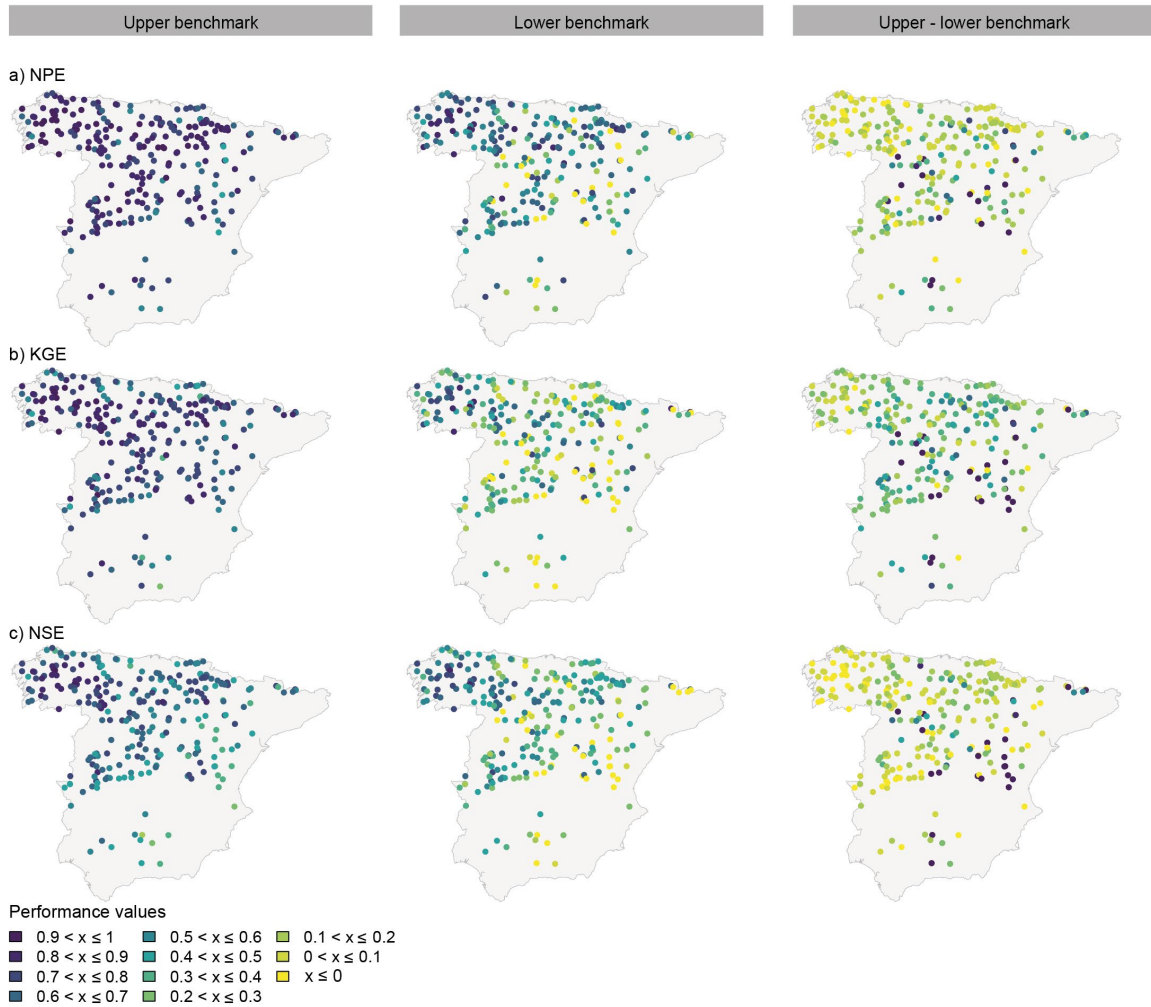

Figure S10: Spatial patterns of model performance for catchments in the Spain (CAMELS-ES dataset) for the upper benchmark (first column), lower benchmark (represented by the ensemble mean of 1000 parameterizations, second column), and the difference between upper and lower benchmark (third column). Values are shown for a) NPE, b) KGE, and c) NSE.

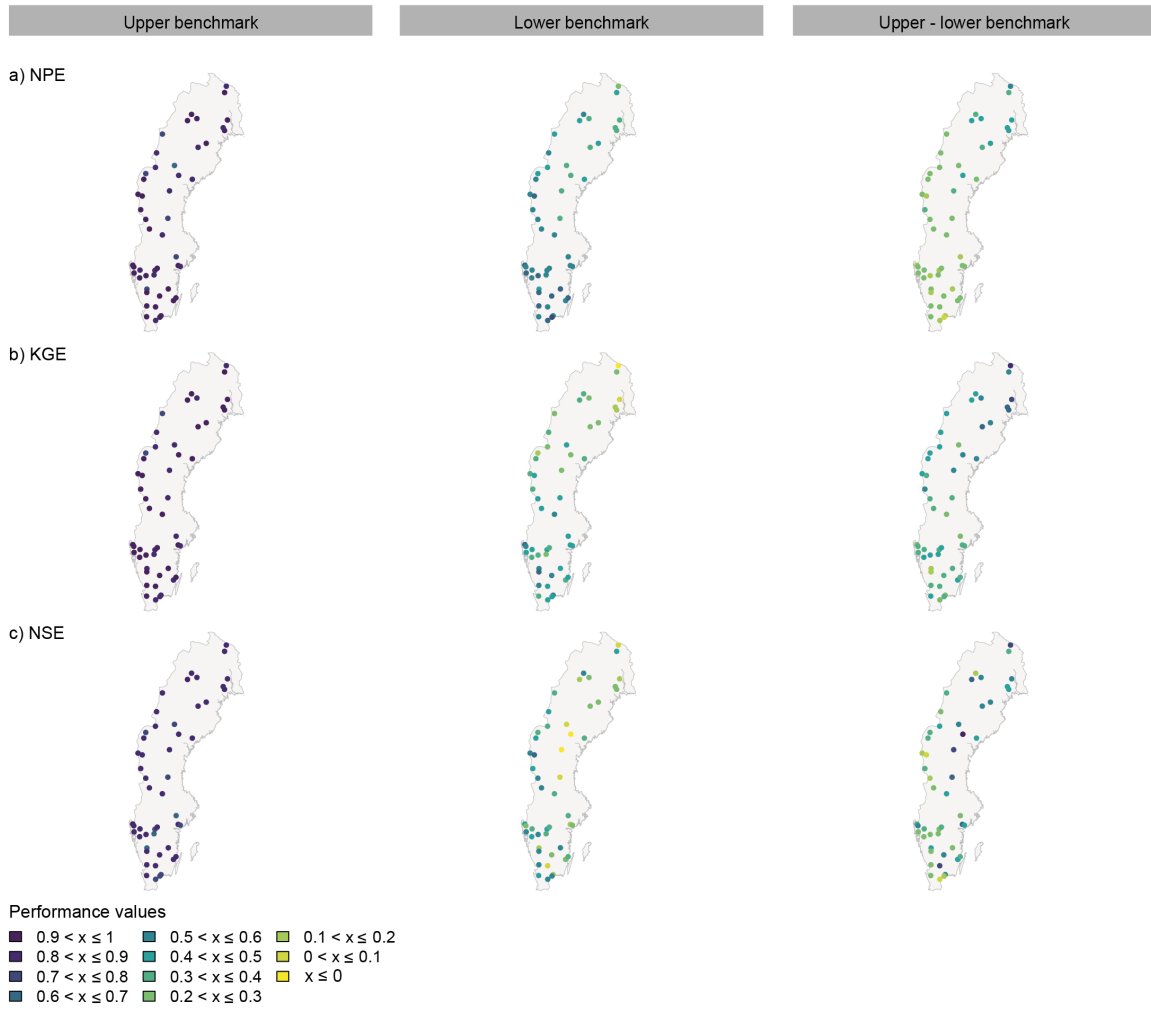

Figure S11: Spatial patterns of model performance for catchments in the Sweden (CAMELS-SE dataset) for the upper benchmark (first column), lower benchmark (represented by the ensemble mean of 1000 parameterizations, second column), and the difference between upper and lower benchmark (third column). Values are shown for a) NPE, b) KGE, and c) NSE.

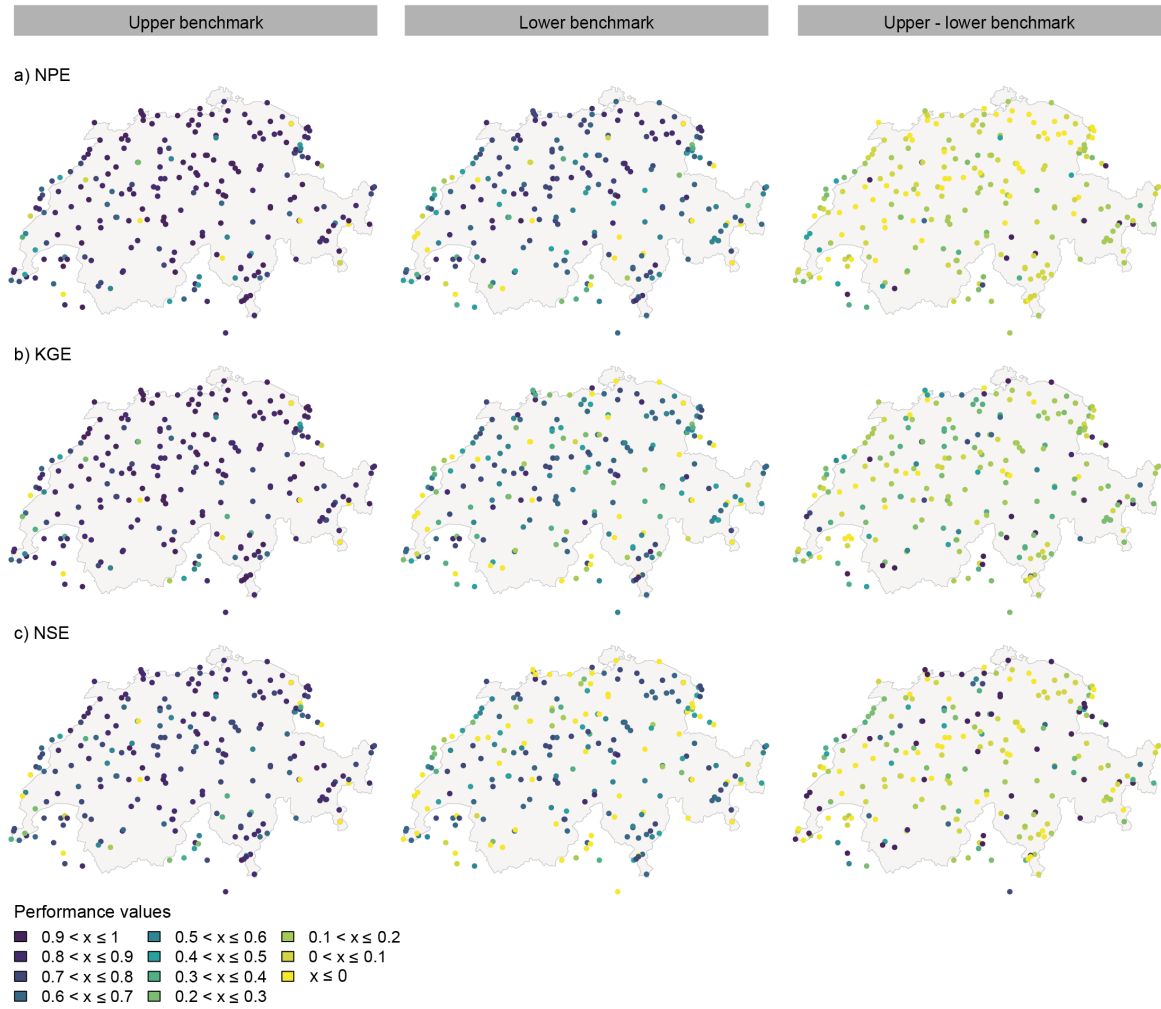

Figure S12: Spatial patterns of model performance for catchments in the Switzerland (CAMELS-CH dataset) for the upper benchmark (first column), lower benchmark (represented by the ensemble mean of 1000 parameterizations, second column), and the difference between upper and lower benchmark (third column). Values are shown for a) NPE, b) KGE, and c) NSE.

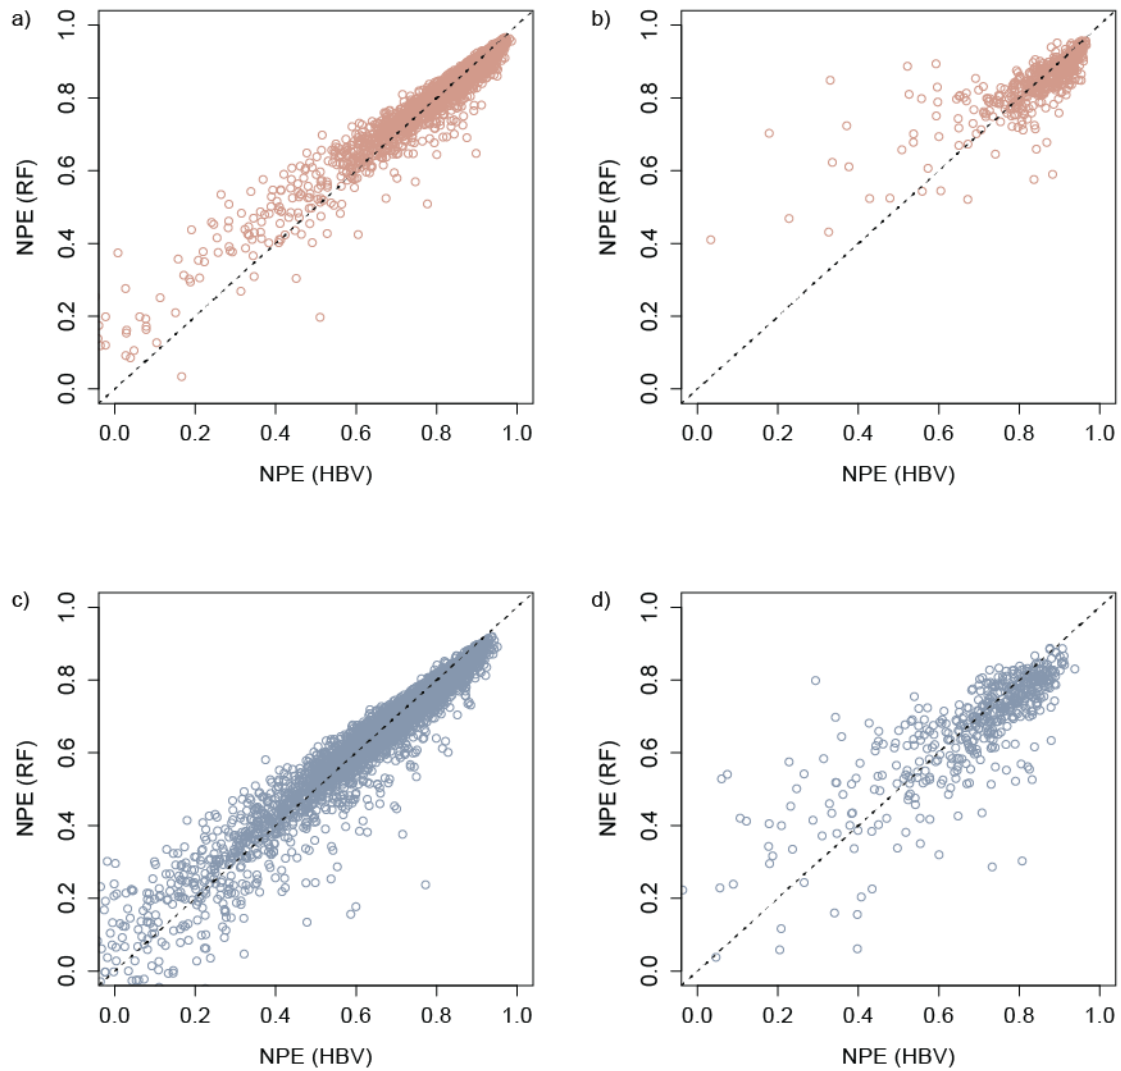

Figure S13: Example of a random forest trained and tested using all CAMELS datasets. The training set was based on 90% of the catchments and the test set was based on the remaining 10% of the catchments. We did a ten-fold validation, i.e., testing and training was repeated 10 times. The example shows one of the ten random forests used to predict RNP (files rf\_UB\_NPE\_1.RDat and rf\_LB\_NPE\_1.RDat). The x-axis shows the “observed” RNP from the HBV model and the y-axis shows the RNP values “simulated” by the random forest. a) RNP for the upper benchmark in the training data set, b) RNP for the upper benchmark in the test data set, c) RNP for the lower benchmark in the training data set, and d) RNP for the lower benchmark in the test data set.

Table S1: Performance of the ten individual random forest models (RF.1 to RF.10) in terms of Pearson correlation coefficient ( $r$ ) and mean absolute error (MAE) when predicting RNP.

| Case | Metric | Sample   | RF.1 | RF.2 | RF.3 | RF.4 | RF.5 | RF.6 | RF.7 | RF.8 | RF.9 | RF.10 | RF.Mean |
|------|--------|----------|------|------|------|------|------|------|------|------|------|-------|---------|
| UB   | $r$    | Training | 0.98 | 0.98 | 0.98 | 0.98 | 0.98 | 0.98 | 0.98 | 0.98 | 0.98 | 0.98  | 0.98    |
| UB   | $r$    | Testing  | 0.76 | 0.78 | 0.82 | 0.79 | 0.85 | 0.82 | 0.83 | 0.77 | 0.96 | 0.94  | 0.83    |
| LB   | $r$    | Training | 0.96 | 0.96 | 0.97 | 0.96 | 0.95 | 0.97 | 0.96 | 0.96 | 0.96 | 0.96  | 0.96    |
| LB   | $r$    | Testing  | 0.91 | 0.71 | 0.59 | 0.82 | 0.94 | 0.7  | 0.72 | 0.84 | 0.82 | 0.88  | 0.79    |
| UB   | MAE    | Training | 0.02 | 0.02 | 0.02 | 0.02 | 0.02 | 0.02 | 0.02 | 0.02 | 0.02 | 0.02  | 0.02    |
| UB   | MAE    | Testing  | 0.05 | 0.05 | 0.05 | 0.04 | 0.05 | 0.05 | 0.05 | 0.06 | 0.04 | 0.05  | 0.05    |
| LB   | MAE    | Training | 0.06 | 0.06 | 0.06 | 0.06 | 0.06 | 0.06 | 0.06 | 0.06 | 0.06 | 0.06  | 0.06    |
| LB   | MAE    | Testing  | 0.13 | 0.14 | 0.13 | 0.13 | 0.11 | 0.12 | 0.13 | 0.12 | 0.14 | 0.12  | 0.13    |

Table S2: same as Table S1, but for RKG.

| Case | Metric | Sample   | RF.1 | RF.2 | RF.3 | RF.4 | RF.5 | RF.6 | RF.7 | RF.8 | RF.9 | RF.10 | RF.Mean |
|------|--------|----------|------|------|------|------|------|------|------|------|------|-------|---------|
| UB   | $r$    | Training | 0.98 | 0.98 | 0.98 | 0.98 | 0.98 | 0.98 | 0.98 | 0.98 | 0.98 | 0.98  | 0.98    |
| UB   | $r$    | Testing  | 0.67 | 0.73 | 0.83 | 0.82 | 0.86 | 0.83 | 0.89 | 0.78 | 0.95 | 0.92  | 0.83    |
| LB   | $r$    | Training | 0.97 | 0.96 | 0.97 | 0.96 | 0.96 | 0.97 | 0.97 | 0.97 | 0.96 | 0.96  | 0.97    |
| LB   | $r$    | Testing  | 0.96 | 0.66 | 0.65 | 0.77 | 0.91 | 0.69 | 0.74 | 0.85 | 0.83 | 0.91  | 0.8     |
| UB   | MAE    | Training | 0.02 | 0.02 | 0.02 | 0.02 | 0.02 | 0.02 | 0.02 | 0.02 | 0.02 | 0.02  | 0.02    |
| UB   | MAE    | Testing  | 0.06 | 0.06 | 0.05 | 0.05 | 0.05 | 0.05 | 0.05 | 0.06 | 0.05 | 0.06  | 0.06    |
| LB   | MAE    | Training | 0.1  | 0.1  | 0.09 | 0.1  | 0.1  | 0.09 | 0.09 | 0.1  | 0.09 | 0.1   | 0.1     |
| LB   | MAE    | Testing  | 0.19 | 0.22 | 0.25 | 0.22 | 0.2  | 0.22 | 0.25 | 0.2  | 0.23 | 0.2   | 0.22    |

Table S3: same as Table S1, but for RNS.

| Case | Metric | Sample   | RF.1 | RF.2 | RF.3 | RF.4 | RF.5 | RF.6 | RF.7 | RF.8 | RF.9 | RF.10 | RF.Mean |
|------|--------|----------|------|------|------|------|------|------|------|------|------|-------|---------|
| UB   | $r$    | Training | 0.96 | 0.97 | 0.96 | 0.96 | 0.96 | 0.96 | 0.97 | 0.97 | 0.97 | 0.97  | 0.96    |
| UB   | $r$    | Testing  | 0.4  | 0.39 | 0.45 | 0.74 | 0.59 | 0.64 | 0.84 | 0.72 | 0.93 | 0.94  | 0.66    |
| LB   | $r$    | Training | 0.97 | 0.96 | 0.97 | 0.95 | 0.95 | 0.97 | 0.97 | 0.97 | 0.98 | 0.97  | 0.97    |
| LB   | $r$    | Testing  | 0.98 | 0.23 | 0.29 | 0.37 | 0.37 | 0.27 | 0.33 | 0.43 | 0.65 | 0.85  | 0.48    |
| UB   | MAE    | Training | 0.06 | 0.06 | 0.06 | 0.06 | 0.06 | 0.06 | 0.06 | 0.06 | 0.06 | 0.06  | 0.06    |
| UB   | MAE    | Testing  | 0.11 | 0.12 | 0.1  | 0.1  | 0.11 | 0.09 | 0.09 | 0.14 | 0.13 | 0.14  | 0.11    |
| LB   | MAE    | Training | 1.22 | 1.22 | 1    | 1.27 | 1.3  | 1.08 | 1.04 | 1.23 | 0.93 | 1.12  | 1.14    |
| LB   | MAE    | Testing  | 2.05 | 2.57 | 3.9  | 2.38 | 2.8  | 3.12 | 3.39 | 1.84 | 5.29 | 2.84  | 3.02    |

Table S4: Version number and the column names (in green) or file names (in blue) of the precipitation (P), temperature (T), potential evapotranspiration (PET), and discharge (Q) time series that were used for the various model runs.

| Camels     | Version          | P series                     | T series                        | PET series                                    | Q series                     |
|------------|------------------|------------------------------|---------------------------------|-----------------------------------------------|------------------------------|
| CAMELS-AUS | Version 2.02     | precipitation_SILO.csv       | tmin_SILO.csv and tmax_SILO.csv | et_morton_point_silo.csv                      | streamflow_mmd.csv           |
| CAMELS-BR  | Version 1.2      | p_chirps                     | tmean_era5land                  | pet_gleam                                     | streamflow_mm                |
| CAMELS-CH  | Version 0.7      | precipitation(mm/d)          | temperature_mean(degC)          | pet_sim(mm/d)                                 | discharge_spec(mm/d)         |
| CAMELS-CL  | -                | 4_CAMELScl_precip_cr2met.txt | 10_CAMELScl_tmean_cr2met.txt    | 12_CAMELScl_pet_hargreaves.txt                | 3_CAMELScl_streamflow_mm.txt |
| CAMELS-DE  | Version 1.0.0    | precipitation_mean           | temperature_mean                | pet_hargreaves                                | discharge_spec_obs           |
| CAMELS-DK  | Version 3.0      | precipitation                | temperature                     | pet                                           | Qobs                         |
| CAMELS-ES  | Version 1.1.0    | total_precipitation_sum      | temperature_2m_mean             | potential_evaporation_sum_FAO_PENMAN_MONTEITH | streamflow                   |
| CAMELS-FR  | Version 2.1      | tsd_prec                     | tsd_temp                        | tsd_pet_pe                                    | tsd_q_mm                     |
| CAMELS-GB  | v1 <sup>1)</sup> | precipitation                | temperature                     | pet                                           | discharge_spec               |
| CAMELS-LUX | Version v1       | RR_rad                       | t2m                             | PET_PM                                        | Qspec                        |
| CAMELS-SE  | Version 1        | Pobs_mm                      | Tobs_C                          | PET_Hamon_mm <sup>2)</sup>                    | Qobs_mm                      |
| CAMELS-US  | Version 1.2      | prcp(mm/day)                 | tmin(C) and tmax(C)             | <sup>3)</sup>                                 | <sup>4)</sup>                |
| LamaH-CE   | Version 1.0      | prec                         | 2m_temp_mean                    | PET_A                                         | qobs                         |

- 1) No official version number, but on 2025-10-21 CAMELS-GB v2 was published.
- 2) PET data files received per email.
- 3) PET values are not provided. PET values were calculated by us using the Priestley-Taylor equation instead.
- 4) Column names are missing, but streamflow values are given in the 5th column.
